# Supplementary material
Source: bioRxiv or medRxiv preprint supplement (https://medrxiv.org/highwire/filestream/77952/field_highwire_adjunct_files/0/2020.04.23.20076455-1.pdf)
Supplement: Supplementary file [file 2020.04.23.20076455-1.pdf]

## Supplementary Material

*Role of the atmospheric pollution in the Covid-19 outbreak risk in Italy*

by *Daniele Fattorini and Francesco Regoli*

### Methods

Elaborated data on COVID-19 in Italy included total regional and provincial confirmed cases, regional number of performed and positive swab test, regional number of fatal events ascribed to SARS-CoV-2. These data were obtained from official daily reports of Italian Civil Protection Department (ICPD, 2020, <https://github.com/pcm-dpc/COVID-19>). ICPD (2020) data is under Creative Commons License 4.0 (CC-BY-4.0, <https://github.com/pcm-dpc/COVID-19/blob/master/LICENSE>), and freely usable, according to specific conditions expressed in the user license; database was accessed on April 6, 2020. The positive test rate (%) was calculated as percentage ratio between number of confirmed positive cases on the number of performed swab test, while mortality rate (%) was obtained as percentage ratio of the fatal events on the number of confirmed COVID-19 cases.

Evaluation of premature deaths due to atmospheric pollution in Europe, including population size and the absolute number of estimated premature deaths, were obtained from the European Environmental Agency Air quality (Report Number 10/2019, last update of 2016, ISBN 978-92-9480-088-6, ISSN 1977-8449, doi:10.2800/822355, available at <https://www.eea.europa.eu/publications/air-quality-in-europe-2019>); reproduction is authorised provided the source is acknowledged). Relative premature deaths were calculated in relation to one million inhabitants, and only countries with more than one million inhabitants were considered here for a more reliable assessment.

Data on the levels of atmospheric pollution (NO<sub>2</sub>, PM<sub>2.5</sub>, PM<sub>10</sub>) in Italy were obtained from the European Environmental Agency (EEA, 2020) database (Monitoring Covid-19 impacts on air pollution. Dashboard Prod-ID: DAS-217-en., accessed on April 6, 2020. <https://www.eea.europa.eu/themes/air/air-quality-and-covid19/monitoring-covid-19-impacts-on>). Data is under a Common Creative License 2.5 (CC BY 2.5 DK, <https://creativecommons.org/licenses/by/2.5/dk/legalcode>), and freely usable, according to specific conditions expressed in the user license. Values related to the last four years (2016-2019 included) of pollutants levels expressed in µg/m<sup>3</sup> on provincial basin were downloaded and utilized to calculate the displayed means. Data on the exceedings of the regulatory limits for O<sub>3</sub> and PM<sub>10</sub> were obtained from Legambiente Annual Dossier series on Air Quality in Italy “Mal’Aria di città, Dossier 2018, 2019 and 2020” (Legambiente 2018, 2019, 2020; <https://www.legambiente.it/malaria-di-citta/>, and European Environmental Agency, EEA 2019).

All the geographical representations (Figures 1, 2, 3) were elaborated with Microsoft Office Excel 365 ProPlus, using Bing and GeoNames Technologies (HERE, MSFT, Microsoft, Creative Commons License CC BY 4.0, freely usable, according to specific conditions expressed in the user license). Multiple Pearson correlation tests (linear model) were performed between the number of confirmed COVID-19 cases in Italy and the air quality data (levels of pollutants, days exceeding regulatory limits, years with more than 35 days exceeding regulatory limits) and significant relationship were assumed at the 0.05 level (two tailed) (Figure 4).
